# Supplementary material for: Solution-processed amorphous ZrO2 gate dielectric films synthesized by a non-hydrolytic sol–gel route
Source: PubMed Central journal article supplement — RSC Adv. 2018 Nov 22;8(68):39115–9. doi: 10.1039/c8ra06911e (PMC9090666; doi:10.1039/c8ra06911e), 2018-11-22
Supplement: RA-008-C8RA06911E-s001.pdf [file RA-008-C8RA06911E-s001.pdf]

## Supporting Information

### **Solution-Processed Amorphous ZrO<sub>2</sub> Gate Dielectric Films**

### **Synthesized by a Non-Hydrolytic Sol-Gel Route**

**Jong-Baek Seon,<sup>a</sup> Nam-Kwang Cho,<sup>a</sup> Gayeong Yoo,<sup>a</sup> Youn Sang Kim<sup>\*ab</sup> and Kookheon Char<sup>\*c</sup>**

<sup>a</sup>*Program in Nano Science and Technology, Graduate School of Convergence Science and Technology, Seoul National University, Seoul 151-744, Republic of Korea. Tel: +82-31-888-9143; E-mail: younskim@snu.ac.kr.*

<sup>b</sup>*Advanced Institutes of Convergence Technology, 864-1 Iui-dong, Yeongtong-gu, Suwon-si, Gyeonggi-do 443-270, Republic of Korea.*

<sup>c</sup>*School of Chemical and Biological Engineering, Seoul National University, Seoul 08826, Republic of Korea. E-mail: khchar.snu.ac.kr*

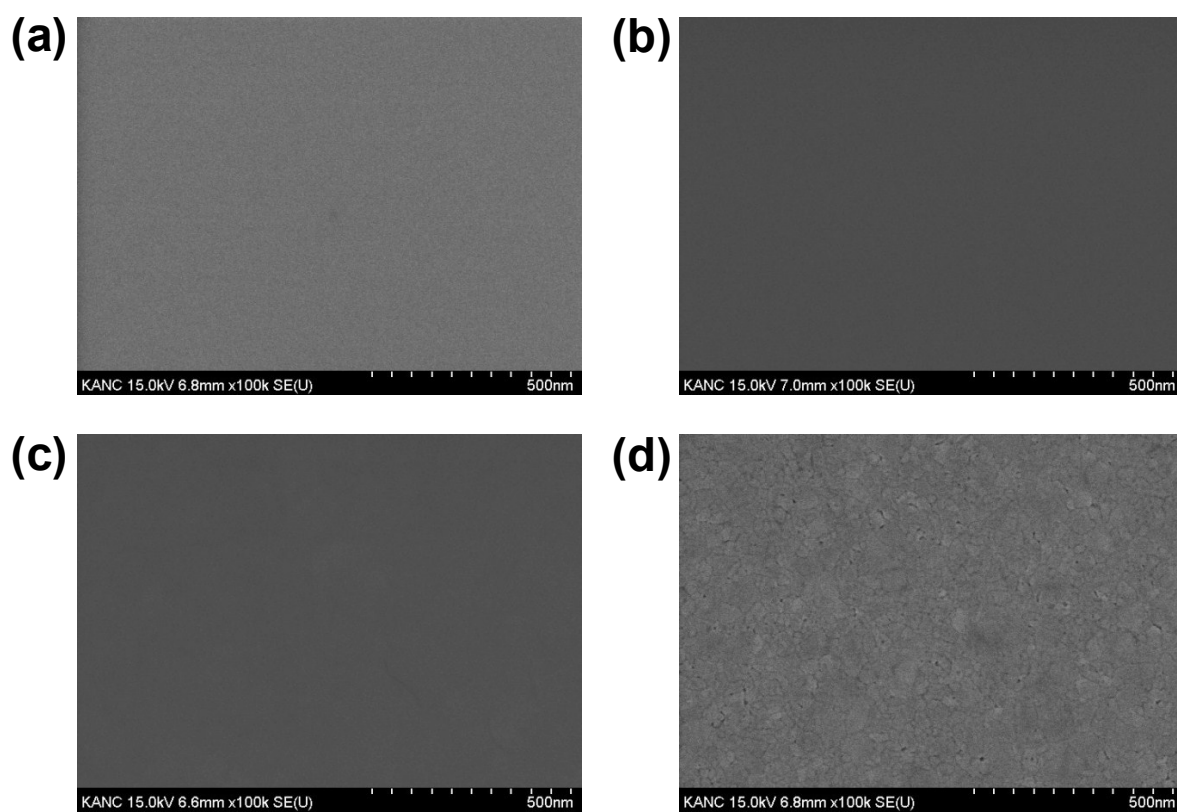

**Fig. S1.** SEM images of (a) thermally oxidized thin SiO<sub>2</sub> films (reference), spin-coated thin ZrO<sub>2</sub> films post-annealed at (a) 300 °C, (b) 400 °C, and (c) 600 °C, respectively.
